# Supplementary material for: Immunocytoprotection after reperfusion with Kv1.3 inhibitors has an extended treatment window for ischemic stroke
Source: Frontiers journal article supplement (doi:10.3389/fphar.2023.1190476), 2023-04-25
Supplement: Data_Sheet_1.PDF [file Data_Sheet_1.PDF]

## *Supplementary Material*

# **Immunocytoprotection after Reperfusion with Kv1.3 Inhibitors has an Extended Treatment Window for Ischemic Stroke**

Ruth D. Lee<sup>1§</sup>, Yi-Je Chen<sup>1,2§</sup>, Latika Singh<sup>1</sup>, Hai M. Nguyen<sup>1</sup>, Heike Wulff<sup>1\*</sup>

\* Correspondence: Heike Wulff: [hwulff@ucdavis.edu](mailto:hwulff@ucdavis.edu)

## **1 Supplementary Figures and Tables**

1 Supplemental Figure showing a comparison of the two vehicles, miglyol and PBS, to each other and of ShK-223 and PAP-1 to a combination of the two vehicle groups.

1 Supplemental Figure showing Kv1.3 expression on acutely isolated CD11b<sup>+</sup> cells from the infarcted hemisphere on day-8 after MCAO in rats confirming previous findings in mice.

3 Supplementary Tables showing the sequences of qPCR primers and the full statistic for the qPCR experiment in Figure 4.

## 1.1 Supplementary Figures

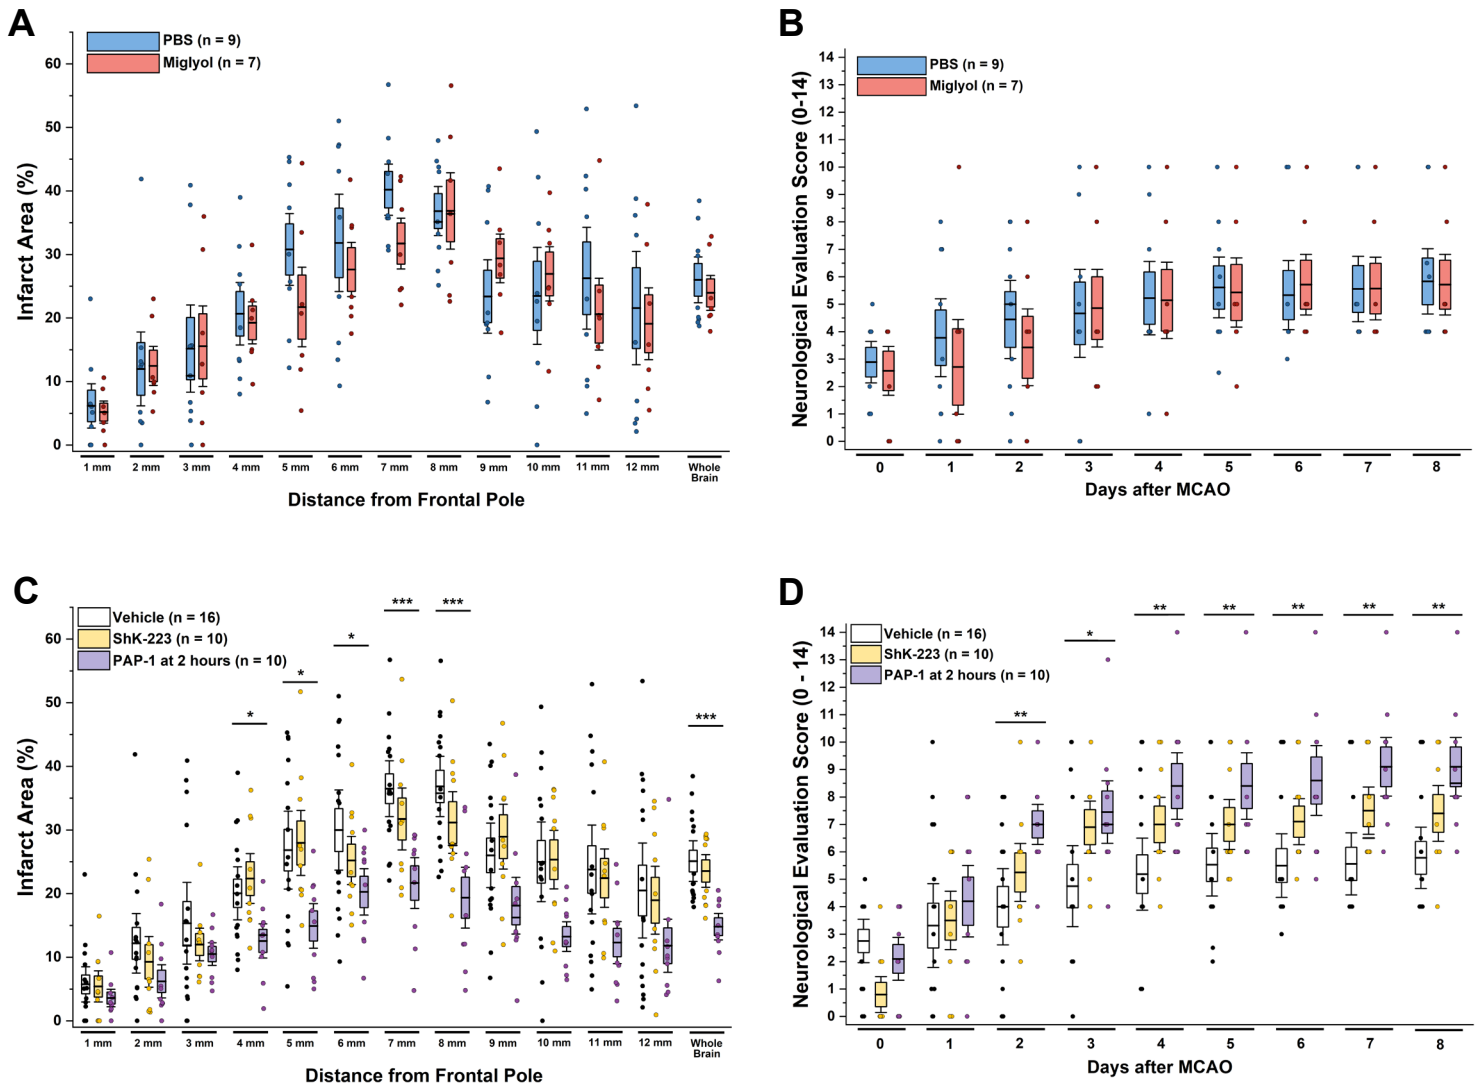

**Supplementary Figure 1. The Kv1.3 blocker PAP-1 but not the peptide ShK-223 reduces infarction and improves neurological deficit in adult male rats.** (A) Infarct area and (B) neurological deficit score in PBS (n = 9) compared to miglyol (n = 7) treated male Wistar rats demonstrating that there is no difference between the two vehicles. (C) Infarct and (D) neurological deficit score in vehicle treated male Wistar rats (n = 16) compared to PAP-1 (40 mg/kg; n = 10,  $P = 0.0004$  for infarct,  $P = 0.003$  for NES on day-8) treated rats and to ShK-223 (100 mg/kg; n = 10,  $P = 0.79103$  for infarct,  $P = 0.2040$  for NES on day-8) treated male Wistar rats. Data are shown as whisker plots with data from individual animals overlayed as scatter. The boxes show mean  $\pm$  S.E.M, the whiskers show confidence intervals.

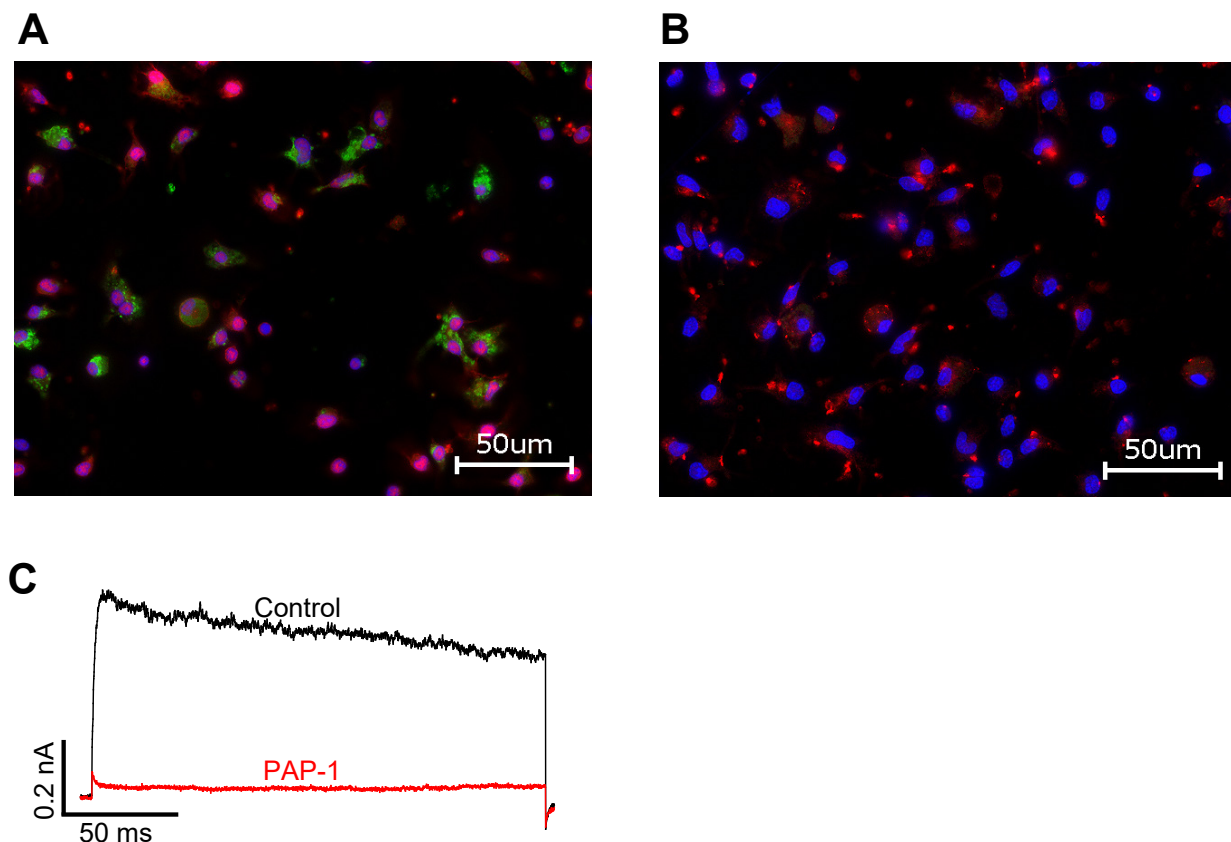

**Supplementary Figure 2. Acutely isolated CD11b<sup>+</sup> cells from the infarcted hemisphere on day-8 after MCAO in rats express Kv1.3 as determined by immunofluorescence and electrophysiology.** Brain tissue was dissociated enzymatically with a Neural Tissue Dissociation Kit (Miltenyi Biotec), microglia isolated using anti-CD11b magnetic beads (Miltenyi Biotec) as described previously (Chen et al., 2018) and plated on poly-L-lysine coated coverslips, permeabilized with 4% buffered formalin and then stained. **(A)** All isolated cells are positive for Iba-1 (rabbit anti-Iba1, Cat#019-19741, Wako 1:3000; secondary antibody is Alexa Fluo®546 goat anti-rabbit IgG(H+L), Cat# A11010, Life Technologies, 1:1000) and many activated cells are positive for ED1 (= CD68; mouse anti-rat-CD68; Cat# MCA341R, Bio-Rad. 1:1000; secondary antibody is Alexa Fluo®488 donkey anti-mouse IgG(H+L), Cat# A21202, Life Technologies, 1:1000). **(B)** Many activated cells stain for Kv1.3 (rabbit anti-Kv1.3, Cat# APC101, Alomone Labs 1:1000; secondary antibody is Alexa Fluo®546 goat Anti-rabbit IgG(H+L), Cat# A11010, Life Technologies, 1:1000). **(C)** K<sub>V</sub> currents were elicited by a 200-ms step pulse from -80 mV to +40 mV as described (Chen et al., 2018). The current is blocked completely by 1 μM of PAP-1.

## 1.2 Supplementary Tables

**Supplementary Table 1**

| <b>Gene</b>   | <b>F Primer</b>           | <b>R Primer</b>           |
|---------------|---------------------------|---------------------------|
| <i>il1b</i>   | CACCTCTCAAGCAGAGCACAG     | GGGTTCCATGGTGAAGTCAAC     |
| <i>il6</i>    | TCCTACCCCAACTTCCAATGCTC   | TTGGATGGTCTTGGTCCTTAGCC   |
| <i>cd68</i>   | CTCATCATTGGCCTGGTCCT      | GTTGATTGTCGTCTGCGGG       |
| <i>cox2</i>   | TGTATGCTACCATCTGGCTTCGG   | GTTTGGAACAGTCGCTCGTCATC   |
| <i>ifng</i>   | ATGAGTGCTACACGCCGCGTCTTGG | GAGTTCATTGACAGCTTTGTGCTGG |
| <i>inos</i>   | GACCAGAACTGTCTCACCTG      | CGAACATCGAACGTCTCACA      |
| <i>tnfa</i>   | AAATGGGCTCCCTCTCATCAGTTC  | TCTGCTTGGTGGTTTGCTACGAC   |
| <i>tgfb</i>   | CAAAGACATCACACACAGTA      | GGTGTTGAGCCCTTTCCAGG      |
| <i>il2*</i>   | CATGTACAGCATGCAGCTCGCATCC | CCACCACAGTTGCTGGCTCATCATC |
| <i>il4*</i>   | TGCACCGAGATGTTTGTACC      | GGATGCTTTTTAGGCTTTCC      |
| <i>il10*</i>  | GCAGGACTTTAAGGGTTACTTGG   | GGGGAGAAATCGATGACAGC      |
| <i>il17a*</i> | CTACCTCAACCGTTCCACT       | TTCTCAGGCTCCCTCTTC        |

\*These primers did not work in our hands.

| <b>Gene</b>  | <b>Biorad Unique Assay ID</b> |
|--------------|-------------------------------|
| <i>actb</i>  | qRnoCID0056984                |
| <i>hmbs</i>  | qRnoCED0057013                |
| <i>ywhaz</i> | qRnoCID0056990                |
| <i>kcnn4</i> | qRnoCID0003361                |
| <i>kcna3</i> | qRnoCED0018850                |
| <i>p2rx4</i> | qRnoCID0003238                |
| <i>p2rx7</i> | qRnoCID0007779                |

## Supplementary Table 2

Housekeeping Gene plate from BioRad

| Gene          | PrimePCR Unique Assay ID |
|---------------|--------------------------|
| <i>actb</i>   | qRnoCID0056984           |
| <i>b2m</i>    | qRnoCED0056999           |
| <i>camlg</i>  | qRnoCED0009273           |
| <i>cd163</i>  | qRnoCID0008321           |
| <i>gapdh</i>  | qRnoCID0057018           |
| <i>hmbs</i>   | qRnoCED0057013           |
| <i>hpert1</i> | qRnoCED0057020           |
| <i>pgkl</i>   | qRnoCED0002588           |
| <i>polr2a</i> | qRnoCED0007537           |
| <i>ppib</i>   | qRnoCED0006997           |
| <i>ppox</i>   | qRnoCED0012992           |
| <i>rpl13a</i> | qRnoCED0056993           |
| <i>rps13</i>  | qRnoCED0002931           |
| <i>rps18</i>  | qRnoCED0003920           |
| <i>sdha</i>   | qRnoCID0057011           |
| <i>tubb5</i>  | qRnoCED0053789           |
| <i>ywhaz</i>  | qRnoCID0056990           |

## Supplementary Table 3: Statistics for qPCR

| Treatment groups           | Samples |
|----------------------------|---------|
| Sham                       | 6       |
| Vehicle Contralateral      | 12      |
| Vehicle Ipsilateral        | 10      |
| PAP-1 (2 hr) Ipsilateral   | 9       |
| PAP-1 (3 days) Ipsilateral | 11      |
| ShK-223 (2 hr) Ipsilateral | 12      |

### *il-1b*

| Dunnett's multiple comparisons test               | Mean Diff. | 95.00% CI of diff. | P-Value | Summary |
|---------------------------------------------------|------------|--------------------|---------|---------|
| Ipsilateral + Vehicle vs. Sham                    | 2.331      | 0.9230 to 3.739    | <0.001  | ***     |
| Ipsilateral + Vehicle vs. Contralateral + Vehicle | 2.19       | 1.004 to 3.377     | <0.001  | ***     |
| Ipsilateral + Vehicle vs. PAP-1 (2 hour)          | 2.63       | 1.357 to 3.904     | <0.001  | ***     |
| Ipsilateral + Vehicle vs. PAP-1 (3 day)           | 2.412      | 1.201 to 3.623     | <0.001  | ***     |
| Ipsilateral + Vehicle vs. ShK                     | 1.84       | 0.6010 to 3.080    | 0.001   | **      |

*il-6*

| Dunnett's multiple comparisons test               | Mean Diff. | 95.00% CI of diff. | P-Value | Summary |
|---------------------------------------------------|------------|--------------------|---------|---------|
| Ipsilateral + Vehicle vs. Sham                    | 5.436      | 1.851 to 9.022     | 0.001   | **      |
| Ipsilateral + Vehicle vs. Contralateral + Vehicle | 4.524      | 1.466 to 7.583     | 0.001   | **      |
| Ipsilateral + Vehicle vs. PAP-1 (2 hour)          | 5.261      | 1.992 to 8.531     | <0.001  | ***     |
| Ipsilateral + Vehicle vs. PAP-1 (3 day)           | 5.346      | 2.229 to 8.463     | <0.001  | ***     |
| Ipsilateral + Vehicle vs. ShK                     | 4.621      | 1.434 to 7.808     | 0.002   | **      |

*tnfa*

| Dunnett's multiple comparisons test               | Mean Diff. | 95.00% CI of diff. | P-Value | Summary |
|---------------------------------------------------|------------|--------------------|---------|---------|
| Ipsilateral + Vehicle vs. Sham                    | 2.655      | 1.582 to 3.727     | <0.001  | ***     |
| Ipsilateral + Vehicle vs. Contralateral + Vehicle | 2.431      | 1.500 to 3.363     | <0.001  | ***     |
| Ipsilateral + Vehicle vs. PAP-1 (2 hour)          | 1.809      | 0.8295 to 2.789    | <0.001  | ***     |
| Ipsilateral + Vehicle vs. PAP-1 (3 day)           | 2.571      | 1.617 to 3.524     | <0.001  | ***     |
| Ipsilateral + Vehicle vs. ShK                     | 2.195      | 1.241 to 3.148     | <0.001  | ***     |

*ifng*

| Dunnett's multiple comparisons test               | Mean Diff. | 95.00% CI of diff. | P-Value | Summary |
|---------------------------------------------------|------------|--------------------|---------|---------|
| Ipsilateral + Vehicle vs. Sham                    | 3.376      | 1.032 to 5.720     | 0.002   | **      |
| Ipsilateral + Vehicle vs. Contralateral + Vehicle | 2.412      | 0.4320 to 4.392    | 0.01    | *       |
| Ipsilateral + Vehicle vs. PAP-1 (2 hour)          | 3.512      | 1.388 to 5.637     | <0.001  | ***     |
| Ipsilateral + Vehicle vs. PAP-1 (3 day)           | 1.832      | -0.1888 to 3.852   | 0.09    | ns      |
| Ipsilateral + Vehicle vs. ShK                     | 1.306      | -0.7622 to 3.374   | 0.38    | ns      |

*Cd68*

| Dunnett's multiple comparisons test               | Mean Diff. | 95.00% CI of diff. | P-Value | Summary |
|---------------------------------------------------|------------|--------------------|---------|---------|
| Ipsilateral + Vehicle vs. Sham                    | 38.4       | 9.213 to 67.59     | 0.006   | **      |
| Ipsilateral + Vehicle vs. Contralateral + Vehicle | 37.15      | 10.90 to 63.40     | 0.002   | **      |
| Ipsilateral + Vehicle vs. PAP-1 (2 hour)          | 1.615      | -26.44 to 29.68    | >0.99   | ns      |
| Ipsilateral + Vehicle vs. PAP-1 (3 day)           | 18.67      | -8.676 to 46.02    | 0.3     | ns      |
| Ipsilateral + Vehicle vs. ShK                     | 18.45      | -8.901 to 45.80    | 0.31    | ns      |

*cox2*

| Dunnett's multiple comparisons test               | Mean Diff. | 95.00% CI of diff. | P-Value | Summary |
|---------------------------------------------------|------------|--------------------|---------|---------|
| Ipsilateral + Vehicle vs. Sham                    | 3.581      | 2.477 to 4.684     | <0.001  | ***     |
| Ipsilateral + Vehicle vs. Contralateral + Vehicle | 3.107      | 2.199 to 4.015     | <0.001  | ***     |
| Ipsilateral + Vehicle vs. PAP-1 (2 hour)          | 3.688      | 2.713 to 4.662     | <0.001  | ***     |
| Ipsilateral + Vehicle vs. PAP-1 (3 day)           | 3.662      | 2.736 to 4.589     | <0.001  | ***     |
| Ipsilateral + Vehicle vs. ShK                     | 3.997      | 3.048 to 4.945     | <0.001  | ***     |

*inos*

| Dunnett's multiple comparisons test               | Mean Diff. | 95.00% CI of diff. | P-Value | Summary |
|---------------------------------------------------|------------|--------------------|---------|---------|
| Ipsilateral + Vehicle vs. Sham                    | 3.634      | 1.080 to 6.188     | 0.003   | **      |
| Ipsilateral + Vehicle vs. Contralateral + Vehicle | 2.684      | 0.5077 to 4.860    | 0.01    | **      |
| Ipsilateral + Vehicle vs. PAP-1 (2 hour)          | 4.148      | 1.821 to 6.475     | <0.001  | ***     |
| Ipsilateral + Vehicle vs. PAP-1 (3 day)           | 3.541      | 1.322 to 5.759     | <0.001  | ***     |
| Ipsilateral + Vehicle vs. ShK                     | 3.097      | 0.8289 to 5.364    | 0.003   | **      |

*tgfb*

| Dunnett's multiple comparisons test               | Mean Diff. | 95.00% CI of diff. | P-Value | Summary |
|---------------------------------------------------|------------|--------------------|---------|---------|
| Ipsilateral + Vehicle vs. Sham                    | -0.6499    | -3.937 to 2.638    | 0.98    | ns      |
| Ipsilateral + Vehicle vs. Contralateral + Vehicle | -1.869     | -4.955 to 1.217    | 0.42    | ns      |
| Ipsilateral + Vehicle vs. PAP-1 (2 hour)          | -4.63      | -7.876 to -1.385   | 0.002   | **      |
| Ipsilateral + Vehicle vs. PAP-1 (3 day)           | -3.716     | -6.875 to -0.5573  | 0.01    | *       |
| Ipsilateral + Vehicle vs. ShK                     | -3.764     | -6.922 to -0.6049  | 0.01    | *       |

*p2x4*

| Dunnett's multiple comparisons test               | Mean Diff. | 95.00% CI of diff. | P-Value | Summary |
|---------------------------------------------------|------------|--------------------|---------|---------|
| Ipsilateral + Vehicle vs. Sham                    | 1.166      | -0.4555 to 2.787   | 0.24    | ns      |
| Ipsilateral + Vehicle vs. Contralateral + Vehicle | 0.9141     | -0.4772 to 2.305   | 0.34    | ns      |
| Ipsilateral + Vehicle vs. PAP-1 (2 hour)          | 0.1509     | -1.342 to 1.644    | >0.99   | ns      |
| Ipsilateral + Vehicle vs. PAP-1 (3 day)           | 0.6475     | -0.8057 to 2.101   | 0.72    | ns      |
| Ipsilateral + Vehicle vs. ShK                     | 0.5527     | -0.9005 to 2.006   | 0.83    | ns      |

*p2x7*

| Dunnett's multiple comparisons test               | Mean Diff. | 95.00% CI of diff. | P-Value | Summary |
|---------------------------------------------------|------------|--------------------|---------|---------|
| Ipsilateral + Vehicle vs. Sham                    | 0.09769    | -1.014 to 1.210    | >0.99   | ns      |
| Ipsilateral + Vehicle vs. Contralateral + Vehicle | 0.06285    | -0.9863 to 1.112   | >0.99   | ns      |
| Ipsilateral + Vehicle vs. PAP-1 (2 hour)          | 0.584      | -0.5783 to 1.746   | 0.61    | ns      |
| Ipsilateral + Vehicle vs. PAP-1 (3 day)           | -0.5905    | -1.661 to 0.4801   | 0.52    | ns      |
| Ipsilateral + Vehicle vs. ShK                     | -0.2983    | -1.394 to 0.7975   | 0.96    | ns      |

*kcnn4*

| Dunnett's multiple comparisons test               | Mean Diff. | 95.00% CI of diff. | P-Value | Summary |
|---------------------------------------------------|------------|--------------------|---------|---------|
| Ipsilateral + Vehicle vs. Sham                    | 6.439      | 0.3250 to 12.55    | 0.04    | *       |
| Ipsilateral + Vehicle vs. Contralateral + Vehicle | 5.896      | 0.6723 to 11.12    | 0.02    | *       |
| Ipsilateral + Vehicle vs. PAP-1 (2 hour)          | 2.393      | -3.394 to 8.180    | 0.78    | ns      |
| Ipsilateral + Vehicle vs. PAP-1 (3 day)           | 1.007      | -4.449 to 6.463    | >0.99   | ns      |
| Ipsilateral + Vehicle vs. ShK                     | 1.175      | -4.281 to 6.631    | 0.99    | ns      |

*kcna3*

| <b>Dunnett's multiple comparisons test</b>        | <b>Mean Diff.</b> | <b>95.00% CI of diff.</b> | <b>P-Value</b> | <b>Summary</b> |
|---------------------------------------------------|-------------------|---------------------------|----------------|----------------|
| Ipsilateral + Vehicle vs. Sham                    | 0.6518            | -0.3841 to 1.688          | 0.35           | ns             |
| Ipsilateral + Vehicle vs. Contralateral + Vehicle | 0.6974            | -0.1631 to 1.558          | 0.16           | ns             |
| Ipsilateral + Vehicle vs. PAP-1 (2 hour)          | 0.9841            | 0.06075 to 1.907          | 0.03           | *              |
| Ipsilateral + Vehicle vs. PAP-1 (3 day)           | 0.7824            | -0.09568 to 1.660         | 0.1            | ns             |
| Ipsilateral + Vehicle vs. ShK                     | 0.5407            | -0.3581 to 1.439          | 0.43           | ns             |
